# Supplementary material for: Microalgae as Sustainable Biofactories to Produce High-Value Lipids: Biodiversity, Exploitation, and Biotechnological Applications
Source: MDPI journal article supplement (doi:10.3390/md19100573), 2021-10-14
Supplement: s1 [file s1]

Supplementary Material

# Microalgae as Sustainable Biofactories to Produce High-Value Lipids: Biodiversity, Exploitation, and Biotechnological Applications

Tomásia Fernandes <sup>1,2</sup> and Nereida Cordeiro <sup>1,2,\*</sup>

<sup>1</sup> Laboratory of Bioanalysis, Biomaterials, and Biotechnology (LB3), Faculty of Exact Sciences and Engineering, University of Madeira, Campus Universitário da Penteada, 9020-105 Funchal, Portugal; tomasia.fernandes@uma.pt

<sup>2</sup> Interdisciplinary Centre of Marine and Environmental Research (CIIMAR), University of Porto, 4450-208 Matosinhos, Portugal

\* Correspondence: ncordeiro@staff.uma.pt

**Table S1.** Insight on the legislation available in European Union to regulate food market.

|                                     | Regulations and Directives   | Brief description                                                                                                                                                         | Ref. |
|-------------------------------------|------------------------------|---------------------------------------------------------------------------------------------------------------------------------------------------------------------------|------|
| Food supplements                    | Directive 2002/46 EC         | Sets-out rules on food supplements to protect consumers<br>Ensure that products are not provided with misleading information                                              | [1]  |
| New (novel) foods                   | Regulation (EU) 2015/2283    | Rules for the placing of novel foods on the market in the EU                                                                                                              | [2]  |
| Feed additives                      | Regulation (EC) No 1831/2003 | Standardized procedure for authorizing feed additives<br>Rules for labelling, placing on the market and use                                                               | [3]  |
| Foods for specific groups           | Regulation (EU) No 609/2013  | Sets-out compositional and labelling requirements for infant formulae<br>Follow-on formulae intended for use by Community infants in good health                          | [4]  |
| Nutrition and health claims on food | Regulation (EC) No 1924/2006 | Ensure a high level of consumer protection<br>Give the consumer the necessary information to make choices<br>Create equal conditions of competition for the food industry | [5]  |
| Medicinal products                  | Regulation (EC) No 726/2004  | Guarantee high standards of quality and safety of medicines in the EU                                                                                                     | [6]  |

**Table S2.** Biological activities studied for microalgae-derived phytosterols in cell culture experiments, and animal models.

| Microalga                      | Extract description                                                | Activity                         | Assay                               | Model                                                                                   | Ref. |
|--------------------------------|--------------------------------------------------------------------|----------------------------------|-------------------------------------|-----------------------------------------------------------------------------------------|------|
| <i>Phormidium autumnale</i>    | Phytosterol-rich fraction                                          | Neuroprotective                  | <i>In vitro</i><br><i>In silico</i> |                                                                                         | [7]  |
| <i>Nannochloropsis oculata</i> | Sterol rich fraction                                               | Anti-inflammatory<br>Anti-cancer | <i>In vitro</i>                     | RAW 264.7 macrophage cells<br>HL-60, A-549, HEP-3B, HCT-116,<br>and SW-480 cancer cells | [8]  |
| <i>Navicula incerta</i>        | Isolated stigmasterol                                              | Anti-proliferative               | <i>In vitro</i>                     | HepG2 cells                                                                             | [9]  |
| <i>Dunaliella tertiolecta</i>  | Phytosterols                                                       | Immunomodulatory                 | <i>In vitro</i>                     | Sheep peripheral blood mononuclear cells                                                | [10] |
|                                | Mix of ergosterol, and 7-dehydroporiferasterol                     | Anti-inflammatory                |                                     |                                                                                         |      |
|                                | Mix of acetylated ergosterol and 7-dehydroporiferasterolergosterol |                                  |                                     |                                                                                         |      |
|                                | Phytosterols                                                       | Neuromodulatory                  | <i>In vivo</i>                      | Rats                                                                                    | [11] |
| <i>Chlorella vulgaris</i>      | Isolated sterols                                                   | Anti-inflammatory                | <i>In vivo</i>                      | ICR mice                                                                                | [12] |

## References

1. Publications Office. Ensuring safe food supplements in the EU Available online: <https://eur-lex.europa.eu/legal-content/EN/LSU/?uri=celex:32002L0046> (accessed on Apr 14, 2021).
2. Publications Office. New (novel) foods — rules from 2018 Available online: <https://eur-lex.europa.eu/legal-content/en/LSU/?uri=CELEX:32015R2283> (accessed on May 24, 2021).
3. Publications Office. Use of additives in feedingstuffs Available online: <https://eur-lex.europa.eu/legal-content/en/LSU/?uri=CELEX:32003R1831> (accessed on May 24, 2021).
4. Publications Office. Foods for specific groups Available online: <https://eur-lex.europa.eu/legal-content/EN/LSU/?uri=celex:32013R0609> (accessed on May 24, 2021).
5. Publications Office. Nutrition and health claims made on foods Languages Available online: <https://eur-lex.europa.eu/legal-content/en/LSU/?uri=CELEX:32006R1924> (accessed on May 24, 2021).
6. Publications Office. Safe medicines for Europeans — European Available online: <https://eur-lex.europa.eu/legal-content/EN/LSU/?uri=celex:32004R0726> (accessed on May 24, 2021).
7. Fagundes, M.B.; Alvarez-Rivera, G.; Mendiola, J.A.; Bueno, M.; Sánchez-Martínez, J.D.; Wagner, R.; Jacob-Lopes, E.; Zepka, L.Q.; Ibañez, E.; Cifuentes, A. Phytosterol-rich compressed fluids extracts from *Phormidium autumnale* cyanobacteria with neuroprotective potential. *Algal Res.* **2021**, *55*, doi:10.1016/j.algal.2021.102264.
8. Sanjeeva, K.K.A.; Fernando, I.P.S.; Samarakoon, K.W.; Lakmal, H.H.C.; Kim, E.A.; Kwon, O.N.; Dilshara, M.G.; Lee, J.B.; Jeon, Y.J. Anti-inflammatory and anti-cancer activities of sterol rich fraction of cultured marine microalga *nannochloropsis oculata*. *Algae* **2016**, *31*, 277–287, doi:10.4490/algae.2016.31.6.29.
9. Kim, Y.S.; Li, X.F.; Kang, K.H.; Ryu, B.M.; Kim, S.K. Stigmasterol isolated from marine microalgae *Navicula incerta* induces apoptosis in human hepatoma HepG2 cells. *BMB Rep.* **2014**, *47*, 433–438, doi:10.5483/BMBRep.2014.47.8.153.
10. Caroprese, M.; Albenzio, M.; Ciliberti, M.G.; Francavilla, M.; Sevi, A. A mixture of phytosterols from *Dunaliella tertiolecta* affects proliferation of peripheral blood mononuclear cells and cytokine production in sheep. *Vet. Immunol. Immunopathol.* **2012**, *150*, 27–35, doi:10.1016/j.vetimm.2012.08.002.
11. Francavilla, M.; Colaianna, M.; Zotti, M.; G. Morgese, M.; Trotta, P.; Tucci, P.; Schiavone, S.; Cuomo, V.; Trabace, L. Extraction, Characterization and In Vivo Neuromodulatory Activity of Phytosterols from Microalga *Dunaliella Tertiolecta*. *Curr. Med. Chem.* **2012**, *19*, 3058–3067, doi:10.2174/092986712800672021.
12. Yasukawa, K.; Akihisa, T.; Kanno, H.; Kaminaga, T.; Izumida, M.; Sakoh, T.; Tamura, T.; Takido, M. Inhibitory effects of sterols isolated from *Chlorella vulgaris* on 12-0-tetradecanoylphorbol-13-acetate-induced inflammation and tumor promotion in mouse skin. *Biol. Pharm. Bull.* **1996**, *19*, 573–576.
